# Supplementary material for: TNF‐α has both stimulatory and inhibitory effects on mouse monocyte‐derived osteoclastogenesis
Source: PubMed Central journal article supplement (PMC5601245; doi:10.1002/jcp.26024), 2017-07-17
Supplement: JCP-232-3273-s001.pdf [file JCP-232-3273-s001.pdf]

Figure S1

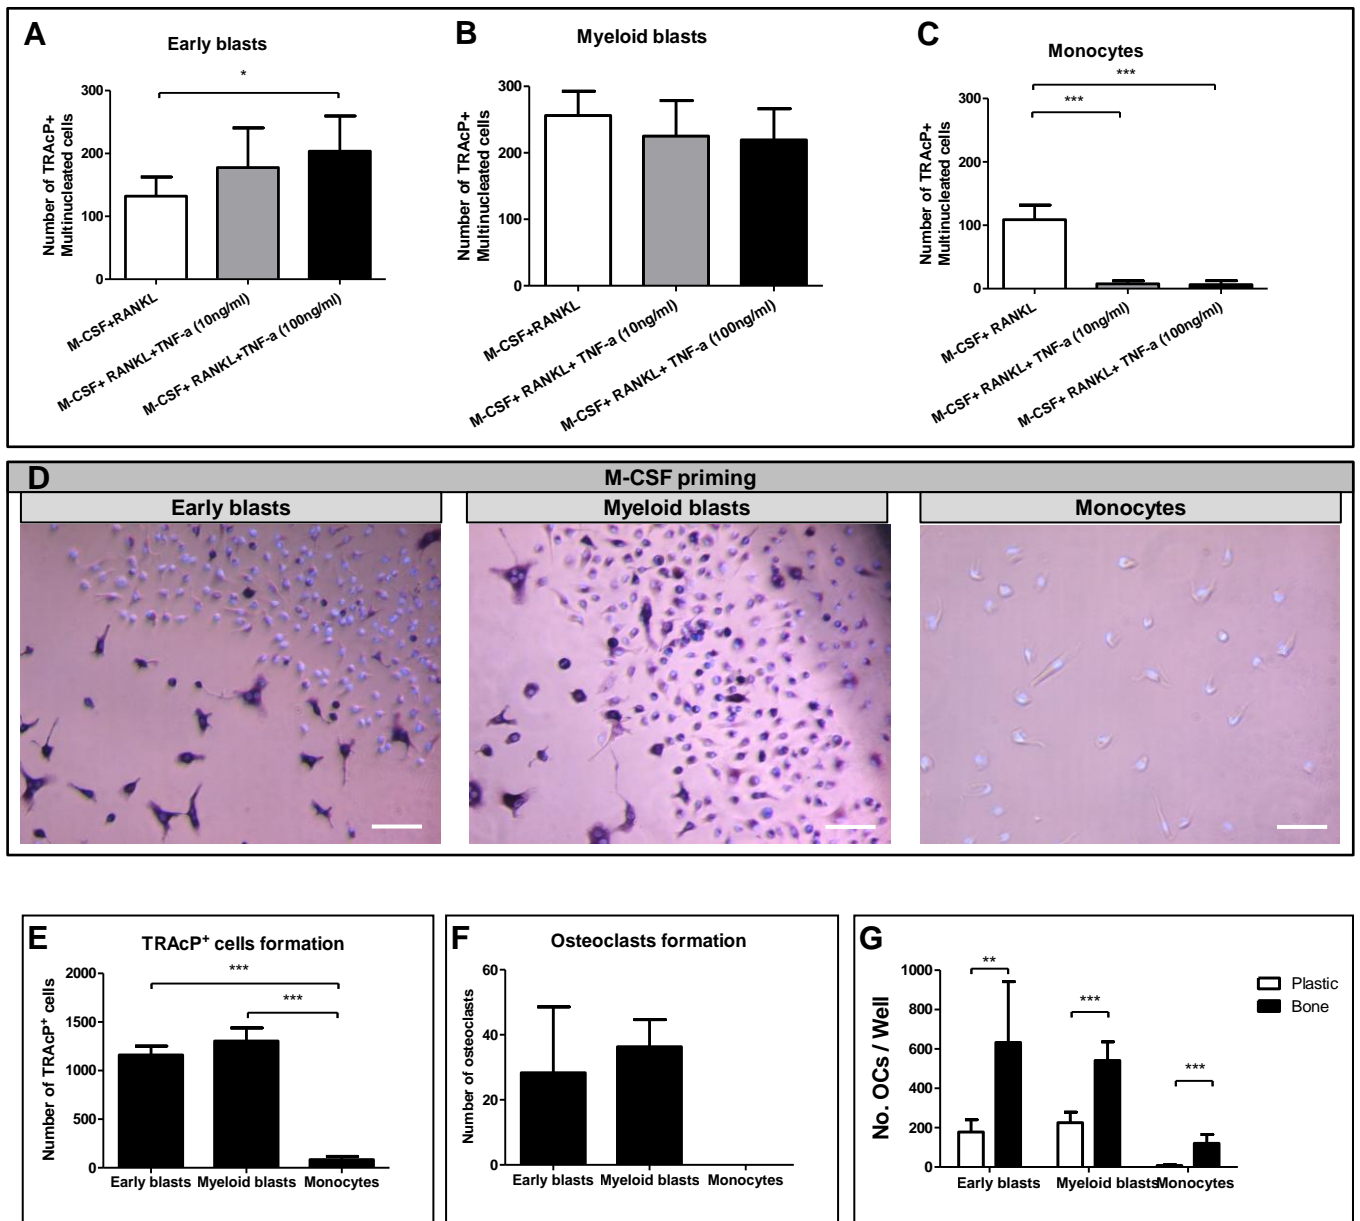

**Figure S1. Osteoclast formation under different culture conditions.** A-C. No significant differences were found in osteoclast formation between different concentrations of TNF- $\alpha$ . Early blasts (A), myeloid blasts (B) and monocytes (C) were cultured with 30 ng/ml M-CSF and 20 ng/ml RANKL (white column); or with 30 ng/ml M-CSF, 20 ng/ml RANKL and 10 ng/ml TNF- $\alpha$  (grey column); or with 30 ng/ml M-CSF, 20 ng/ml RANKL and 100 ng/ml TNF- $\alpha$  (black column) for 5 days on plastic. The total number of TRAcP<sup>+</sup> multinucleated cells (>2 nuclei) were counted as osteoclasts. (D) M-CSF priming did not trigger osteoclast precursors to respond to TNF- $\alpha$ . Micrographs are of the three subsets cultured with only 30 ng/ml M-CSF for 3 days before adding 10 ng/ml TNF- $\alpha$ , 30 ng/ml M-CSF and 20 ng/ml RANKL for another 2 days. Scale bar= 100  $\mu$ m. E-F. TNF- $\alpha$  drove RANKL independent osteoclastogenesis in early blast and myeloid blast cultures, but not in monocyte cultures. Early blasts, myeloid blasts and monocytes were cultured with only 30 ng/ml M-CSF and 10 ng/ml TNF- $\alpha$  on plastic for 5 days. Total number of TRAcP<sup>+</sup> cells (including the mononuclear cells) (E) as well as the number of osteoclasts (nuclei >2 TRAcP<sup>+</sup> cells) (F) were counted. There were almost no TRAcP<sup>+</sup> cells visible in monocyte cultures. G. Cells cultured on bone slices gave significantly higher number of osteoclasts than cultured on plastic. Cells were cultured with 30 ng/ml M-CSF, 20 ng/ml RANKL and 10 ng/ml TNF- $\alpha$  on plastic for 5 days (white column) or on bone slices for 6 days (black column) (n=6, \* P<0.05, \*\* P<0.01, \*\*\*P<0.001).

**Figure S2**

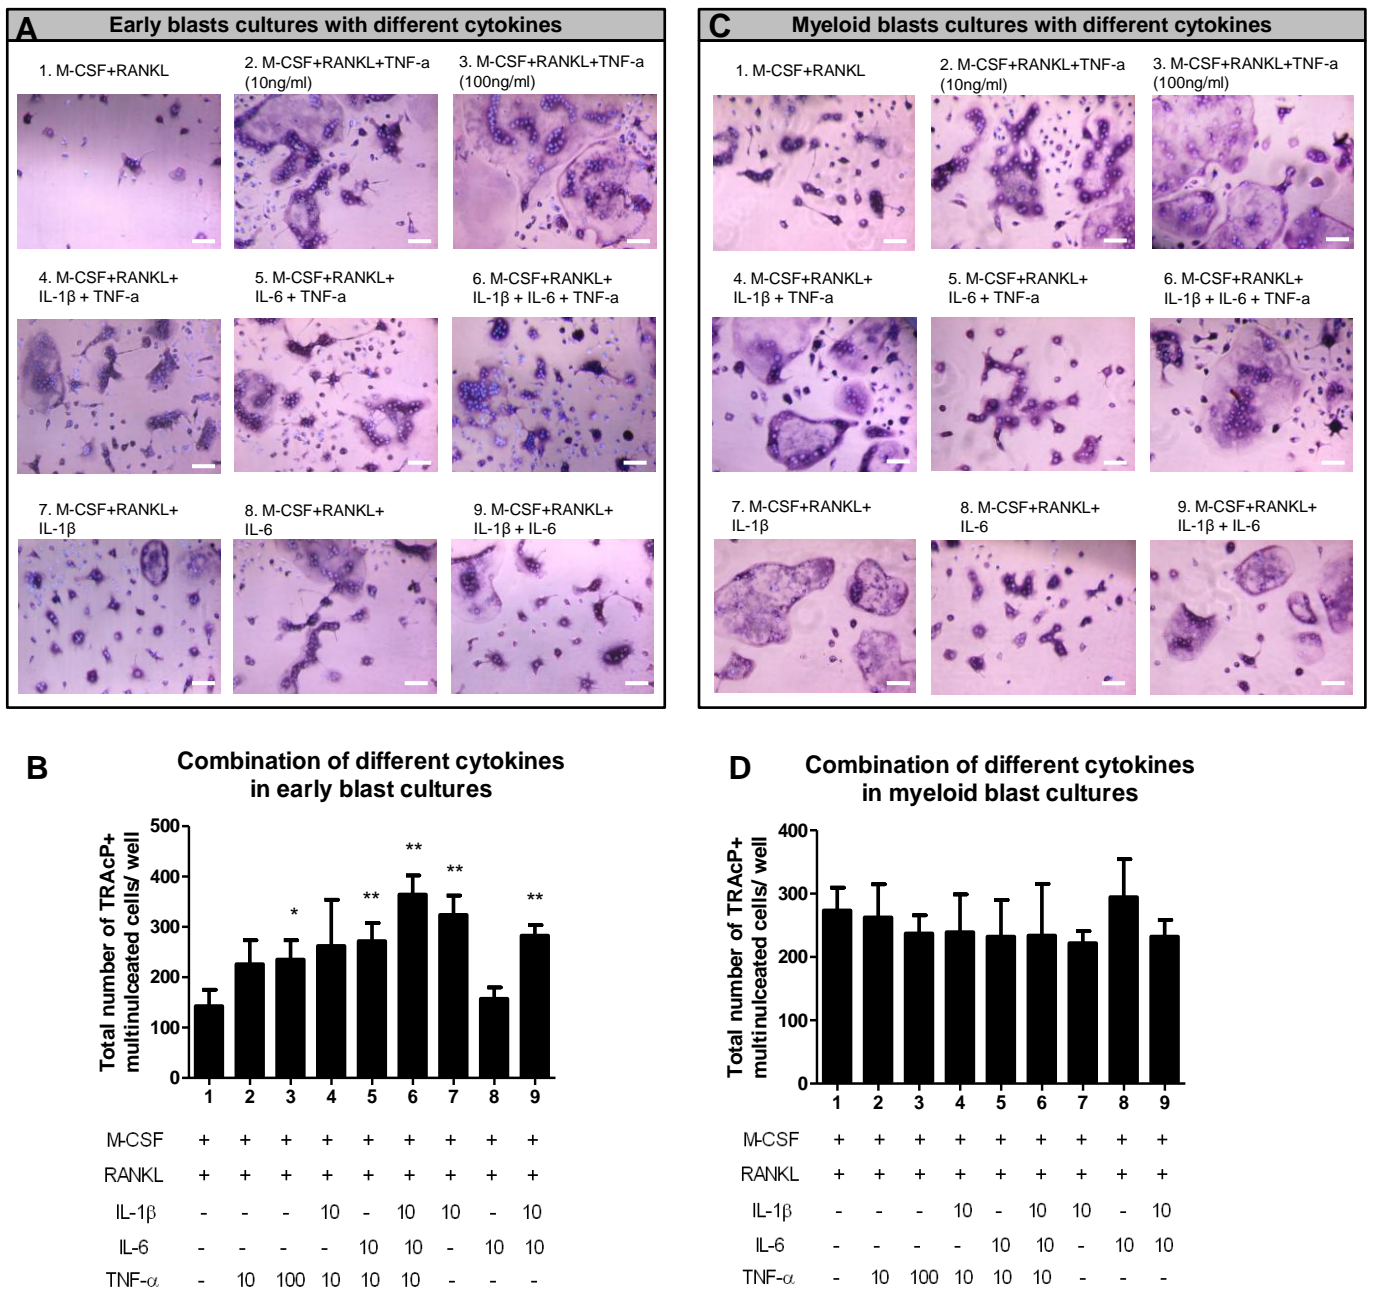

**Figure S2. Effects of different cytokines on early blasts and myeloid blasts.** (A) Micrographs of early blast cultures on plastic with the combination of different cytokines. (B) Total number of TRAcP<sup>+</sup> multinucleated cells of these 9 different culture conditions in early blast cultures. (C) Micrographs of myeloid blast cultures on plastic with the combination of different cytokines. (D) Total number of TRAcP<sup>+</sup> multinucleated cells of these 9 different culture conditions in myeloid blast cultures. Cells with >2 nuclei were counted as osteoclasts. Scale bar= 100  $\mu$ m (n=6, \* P<0.05, \*\* P<0.01).

Figure S3

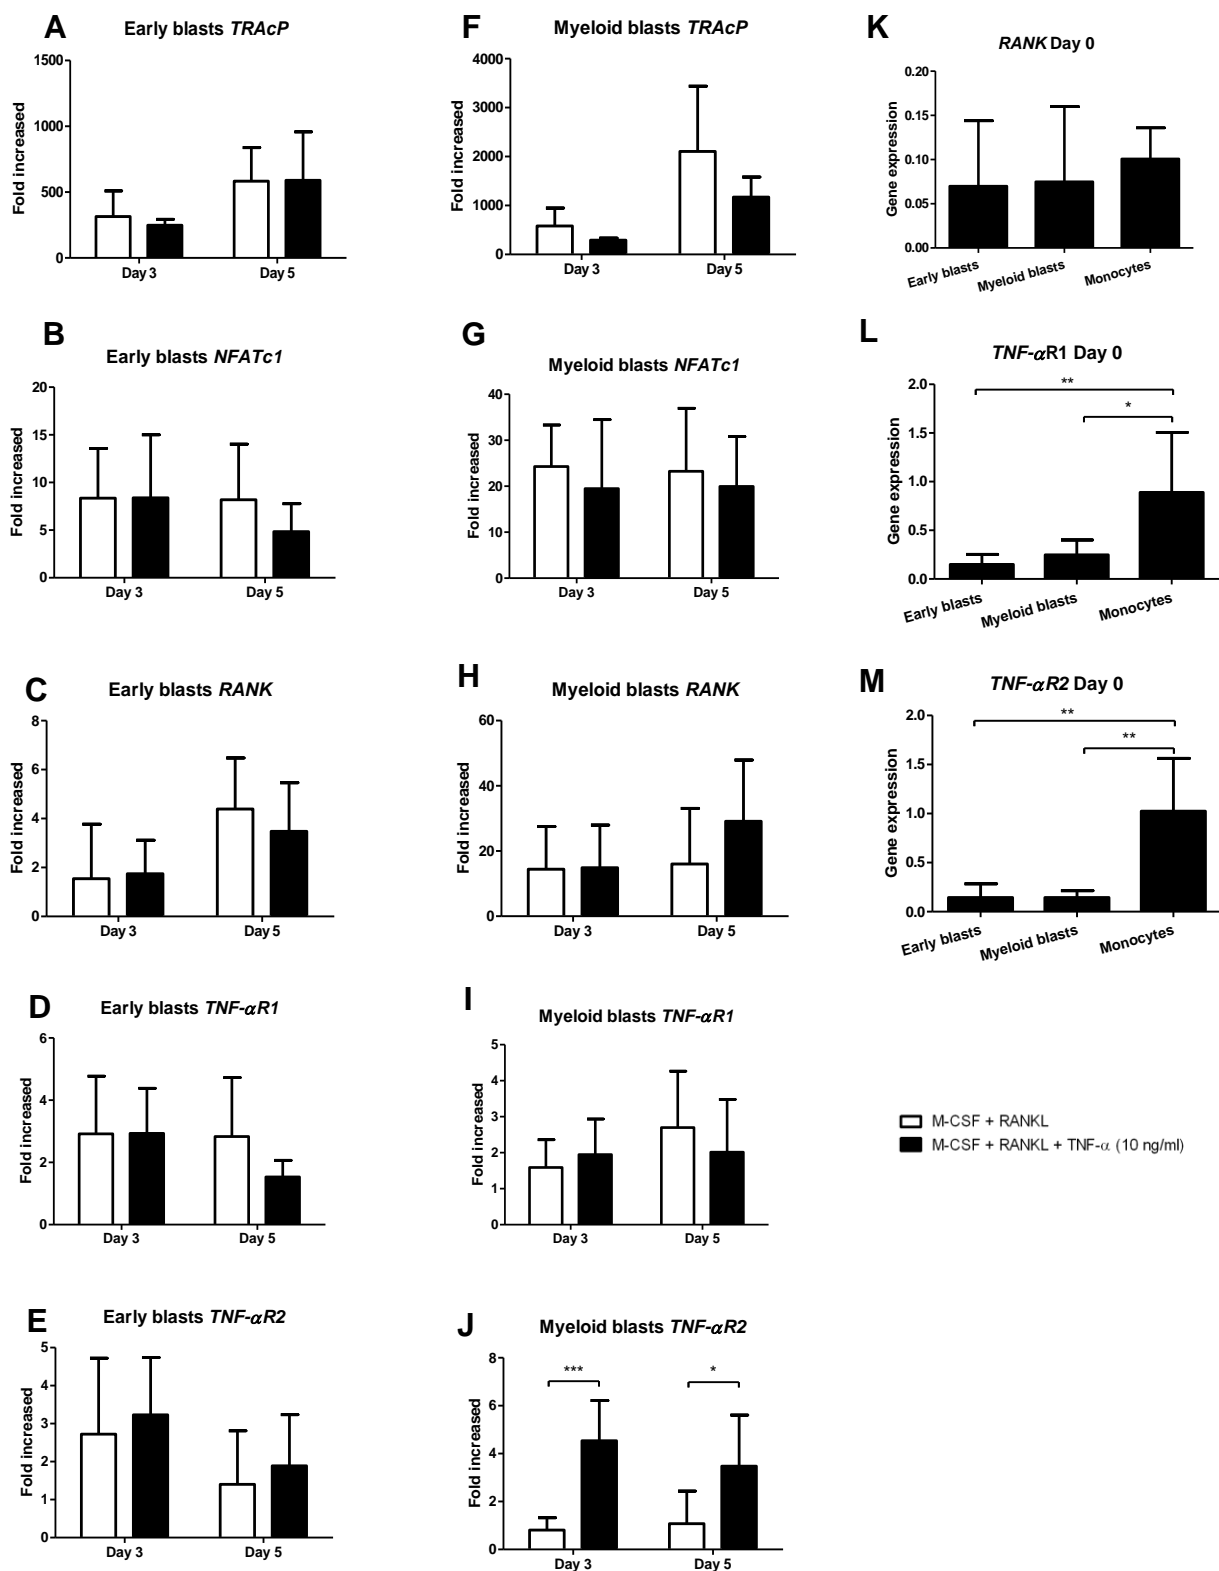

**Figure S3. Gene expression.** A-E. Fold increase (compared to day 0) of genes *TRAcP* (A), *NFATc1* (B), *RANK*(C), *TNF- $\alpha$ R1* (D) and *TNF- $\alpha$ R2* (E), of early blast cultures on plastic. F-J. Fold increase (compared to day 0) of the same genes, *TRAcP* (F), *NFATc1* (G), *RANK* (H), *TNF- $\alpha$ R1* (I) and *TNF- $\alpha$ R2* (J) expressed by myeloid blast cultures on plastic. Cells were either cultured on plastic with 30 ng/ml M-CSF and 20 ng/ml RANKL (white column) or cultured with 30 ng/ml M-CSF, 20 ng/ml RANKL and 10 ng/ml TNF- $\alpha$  (black column) and stopped at day 3 or day 5. K-M. Expression of *RANK* (K), *TNF- $\alpha$ R1* (L) and *TNF- $\alpha$ R2* (M) by early blasts, myeloid blasts and monocytes immediately after isolation (n=6, \* P<0.05, \*\* P<0.01, \*\*\*P<0.001).
